# Supplementary material for: Expression of Fused in sarcoma mutations in mice recapitulates the neuropathology of FUS proteinopathies and provides insight into disease pathogenesis
Source: PubMed Central journal article supplement (PMC3519790; doi:10.1186/1750-1326-7-53), 2012-10-10

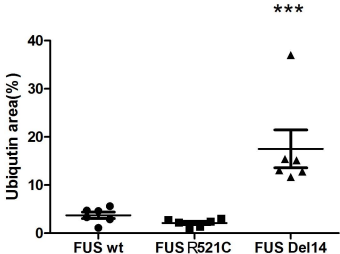

Supplement: 1750-1326-7-53-S4.pdf [file 1750-1326-7-53-S4.pdf]
